1 *Mycobacterium ulcerans* in Mosquitoes and March flies captured from endemic  
2 areas of Northern Queensland, Australia

3 Avishek Singh <sup>1\*</sup>, William John Hannan McBride <sup>1</sup>, Brenda Govan <sup>2</sup>, Mark Pearson <sup>3</sup> and Scott  
4 A. Ritchie<sup>4</sup>

5 <sup>1</sup>Cairns Clinical School, College of Medicine and Dentistry, James Cook University, Cairns  
6 City, QLD 4870, Australia; [john.mcbride@jcu.edu.au](mailto:john.mcbride@jcu.edu.au)

7 <sup>2</sup> College of Public Health, Medical & Vet Sciences, James Cook University, Townsville, QLD  
8 4811, Australia; [brenda.govan@jcu.edu.au](mailto:brenda.govan@jcu.edu.au)

9 <sup>3</sup> Australian Institute of Tropical Health & Medicine, James Cook University, Smithfield, QLD  
10 4878, Australia; [mark.pearson@jcu.edu.au](mailto:mark.pearson@jcu.edu.au)

11 <sup>4</sup>College of Public Health, Medical and Veterinary Sciences, James Cook University,  
12 Smithfield, QLD 4878, Australia; Australian Institute of Tropical Health and Medicine  
13 (AITHM), James Cook University, Smithfield, QLD 4878, Australia; [scott.ritchie@jcu.edu.au](mailto:scott.ritchie@jcu.edu.au)

14  
15 \* Correspondence: [avishek.singh@my.jcu.edu.au](mailto:avishek.singh@my.jcu.edu.au)

16

17

18

19

20

21

22 **Abstract:**

23 *Mycobacterium ulcerans* is the causative agent of Buruli ulcer (BU). This nontuberculous  
24 mycobacterial infection has been reported in over 33 countries worldwide. In Australia, the  
25 majority of cases of BU have been recorded in coastal Victoria and the Mossman-Daintree  
26 areas of north Queensland. Mosquitoes have been postulated as a vector of *M. ulcerans* in  
27 Victoria, however the specific mode of transmission of this disease is still far from being well  
28 understood. In the current study, we trapped and analysed 16,900 (allocated to 845 pools)  
29 mosquitoes and 296 March flies from the endemic areas of north Queensland to examine for  
30 the presence of *M. ulcerans* DNA by polymerase chain reaction. Seven of 845 pools of  
31 mosquitoes were positive on screening using the IS2404 PCR target but only one pool was  
32 positive for presence of *M. ulcerans* after confirmatory testing. None of the March fly samples  
33 were positive for the presence of *M. ulcerans*. *M. ulcerans* was detected on proboscises of  
34 deliberately exposed mosquitoes.

35 **Author Summary:**

36 The causative agent of Buruli ulcer is *Mycobacterium ulcerans*. This destructive skin disease  
37 is characterized by extensive and painless necrosis of skin and underlying tissues usually on  
38 extremities of body due to production of toxin named mycolactone. The disease is prevalent in  
39 Africa and coastal Australia. The exact mode of transmission and potential environmental  
40 reservoir for the pathogen still remain obscure. Aquatic and biting insects have been identified  
41 as important niche in transmission and maintenance of pathogen in the environment. In this  
42 study we screened mosquitoes and march flies captured from endemic areas of northern  
43 Queensland for the presence of *M. ulcerans*. In addition, we conducted artificial blood feeding  
44 experiment to identify the role of mosquitoes in transmission of this pathogen. We found one  
45 pool of mosquito out of 845 pools positive for *M. ulcerans* and none of the March fly samples

46 were positive. This could indicate a low burden of the bacteria in the environment coinciding  
47 with a comparatively low number of human cases of *M. ulcerans* infection seen during the  
48 trapping period of the study. Evidence to support mechanical transmission via mosquito  
49 proboscises was found.

50

51

52

53

54

## 55 **Introduction:**

56 Buruli ulcer (BU), also known regionally as Daintree ulcer in north Queensland, Australia or  
57 Bairnsdale ulcer in Victoria, Australia, is an emerging disease of skin and underlying tissue,  
58 with a potential to lead to permanent disability, particularly if treatment is inadequate or  
59 delayed. The causative agent of this disease, *M. ulcerans* secretes a polyketide exotoxin,  
60 mycolactone, the production of which requires expression of a series of contiguous genes on  
61 the large pMUM001 plasmid. This exotoxin is the main virulence determinant of the bacteria  
62 (1). The outbreaks of BU have been consistently linked with wetland or coastal regions (2).  
63 Environmental samples such as water, aquatic plants, soil at endemic areas has been found  
64 PCR-positive for *M. ulcerans* DNA (3, 4). Insects such as mosquitoes and aquatic bugs has  
65 been proposed as a vital ecological niche for the maintenance of pathogen in environment (5,  
66 6).The detection of *M. ulcerans* DNA in insects does not prove their ability to transmit *M.*

67 *ulcerans* but could indicate potential to act as either biological or mechanical vector. A study  
68 conducted by Marsollier and his colleagues provided evidence of the presence of *M. ulcerans*  
69 in the salivary gland of wild caught Naucoridae (aquatic bug). They successfully isolated the  
70 pathogen by culture from the salivary glands of aquatic bugs and suggested aquatic insects as  
71 having an important ecological niche in the maintenance of the organism in the environment.  
72 They were also able to demonstrate transmission to mice in a laboratory environment (6).  
73 Similarly, a study conducted by Wallace *et al.* provided evidence of the ability of mosquitoes  
74 to act as a mechanical vector of *M. ulcerans* (7). Studies conducted in endemic areas of Africa  
75 suggest that conducting farming activities close to rivers (8) and swimming in rivers located in  
76 endemic areas (9) are risk factors for exposure to *M. ulcerans*.

77 In Australia, foci of BU infection have been found in tropical Far North Queensland (10, 11),  
78 the Capricorn Coast region of central Queensland (10), the Northern Territory (12) and  
79 temperate coastal Victoria (5). Victorian researchers detected the presence of *M. ulcerans* in  
80 five different species of mosquito during a BU outbreak in an endemic area of Victoria,  
81 Australia. They demonstrated the absence of *M. ulcerans* in a neighbouring area, where BU  
82 did not occur (5). Together, the evidence was proposed to support a link with mosquitoes in  
83 the ecology of BU in Victoria (5, 13). More recently, there was a report of the presence *M.*  
84 *ulcerans* in a single mosquito out of two pools collected in the BU endemic region of north  
85 Queensland. The isolated detection of *M. ulcerans* in a tropical endemic region in Australia  
86 highlighted a need to examine a larger sample size to gauge the significance of the role of  
87 mosquito in ecology of BU in Northern Queensland (14). An additional hypothesis put forward  
88 by the local population (including people with a history of BU) was that March flies  
89 (Tabanidae) might have a role in transmission (Villager *et al*, unpublished manuscript). We  
90 therefore aimed, in this study to capture and screen mosquitoes and March flies for the presence  
91 of *M. ulcerans* DNA in the BU endemic area of Northern Queensland. In addition, we

92 conducted a mosquito artificial blood feeding experiment to demonstrate an in vitro basis for  
93 mechanical transmission of *M. ulcerans* by blood fed mosquitoes.

94 **Material and Methodology:**

95 Selection of the study site was based on GIS mapping of human cases of BU in Northern  
96 Queensland (15). We divided the endemic area of northern Queensland into three regions:  
97 Region-1: extending from Miallo to lower Daintree including Wonga/Wonga Beach area,  
98 Region-2: Forest Creek area and Region-3: Upper Daintree area for ease of sampling and  
99 analysis (Fig. 1).

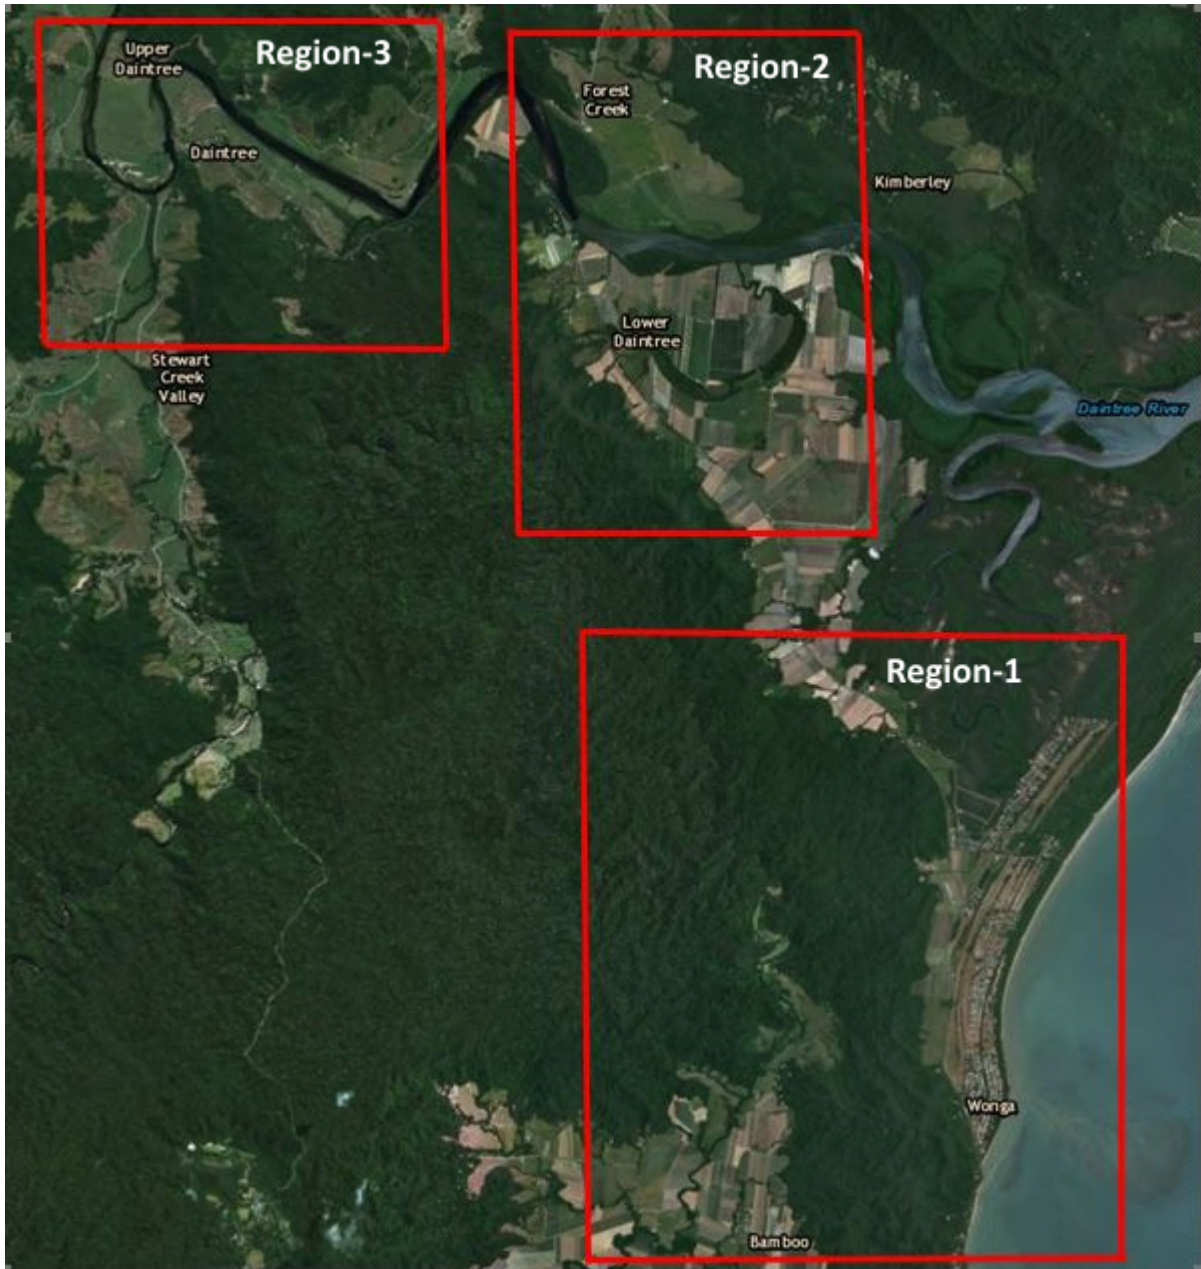

100

101 **Fig. 1: BU endemic areas of Northern Queensland, Australia and Mosquito trapping**

102 **regions. This figure was created using base layer obtained from**

103 <https://landsatlook.usgs.gov/>

104

105 **Trapping of Mosquitoes:**

106 Mosquitoes were captured using a model 512 “CDC miniature light trap” (John W. Hock  
107 Company, Gainesville Florida USA) baited with 1 kg of dry ice as the source of CO<sub>2</sub>. This  
108 trap is the most reliable, efficient and portable device for trapping mosquitoes and sand flies  
109 (16). This trap consists of an electric light and fan just over the collection container and is  
110 operated by a 12V battery. A two liter insulated container was used to hold dry ice and a pipe  
111 was attached to release CO<sub>2</sub> over the trap to attract mosquitoes (Fig. 2). Thirty overnight  
112 trapping sessions were conducted starting from September 2016 through to February 2018,  
113 with at least 4 CDC traps placed within a 1 kilometer radius of each-other. Of the 30 trapping  
114 sessions, 14 were conducted at eight different sites within region-1, nine at six different sites  
115 within region-2 and seven at five different sites of region-3 (Fig. 1). Traps were placed at  
116 different sites after obtaining permission to access properties from the owners and selection of  
117 sites were based on history of BU cases in humans in nearby households. Geographical  
118 Information System (GIS) coordinates of each trap was recorded. On each occasion, traps were  
119 set before dusk and checked for mosquitoes after dawn the next morning. After each occasion  
120 of trapping, catches were transported to the Mosquito Research Facility, Australian Institute of  
121 Tropical Health and Medicine (AITHM), James Cook University, Cairns, Australia where they  
122 were counted, sorted and pooled by genus, with each pool containing  $\leq 20$  mosquitoes of same  
123 genus and collected from the same site.

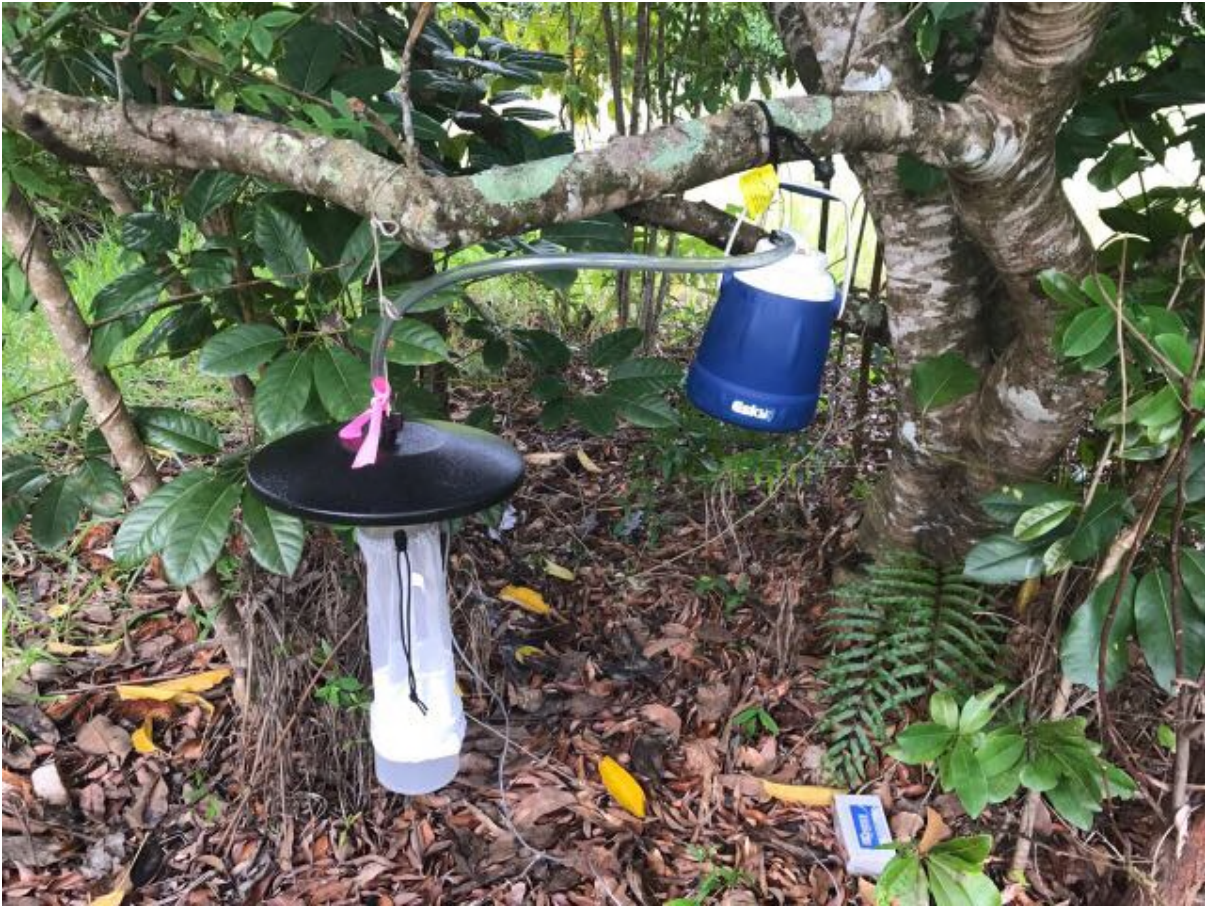

124

125

**Fig. 2. CDC miniature light trap baited with dry ice**

126

**Trapping of March Flies:**

127

Several attempts were made to trap march flies from endemic areas with an investigator

128

wearing dark clothes to attract them, or with the use of an insect net sprayed with insecticide.

129

These attempts occurred from February 2016 through September 2016. The yield from these

130

attempts were very low. A request was made to residents of region-1 through the local State

131

School to collect march flies. This effort was successful and large numbers of March flies of

132

genus *Tabanus* were collected by the local community. The addresses of properties from which

133

March flies were collected were recorded. Sampling of March flies was restricted to region-1.



## 134 **Screening of Mosquitoes and March Flies for MU DNA by PCR:**

135 DNA was extracted from each pools of  $\leq 20$  mosquitoes of the same genus by using the  
136 FastPrep Instrument (MP Biomedicals, Solon, OH, USA) as per manufacturer's instruction  
137 with FastDNA Kit (MP Biomedicals). Using the same instrument, DNA from individual  
138 March fly was extracted with FastDNA Spin Kit (MP Biomedicals). Extracted DNA was stored  
139 at  $-20\text{ }^{\circ}\text{C}$ . The extracted DNA samples were screened for the presence of *M. ulcerans* DNA by  
140 using a semi-quantitative real-time PCR adapted from a method for the detection of *M. ulcerans*  
141 DNA from environmental samples (17). To rule-out the possibility of contamination, three  
142 negative controls (double deionized water, MilliQ) and three positive controls (purified *M.*  
143 *ulcerans* DNA obtained from Victorian Infectious Disease Reference Laboratory) were used  
144 during RT-PCR assay run. All of the extracted DNA samples were initially screened for the *M.*  
145 *ulcerans* insertion sequence element IS 2404. Samples positive for IS 2404 were re-analyzed  
146 by a second real-time PCR for the detection of two additional regions in the genome of *M.*  
147 *ulcerans*: IS 2606 and ketoreductase B domain (KR). This screening process has been validated  
148 by Fyfe *et al.* to differentiate *M. ulcerans* from other mycolactone producing mycobacteria  
149 (MPM) (17). They suggested that the difference in real-time PCR cycle thresholds (Ct) between  
150 IS 2606 and IS 2404 ( $\Delta\text{Ct}$  [IS 2606 – IS 2404]) allows for the differentiation of *M. ulcerans*  
151 from other MPM that contain IS 2404 but which have fewer copy numbers of IS 2606. The  
152 detection of all three targets (IS 2404, IS 2606 and KR) with an expected  $\Delta\text{Ct}$  values ( $< 7$ )  
153 confirms the presence of *M. ulcerans* DNA in the sample. (17, 18).

## 154 **Mosquito artificial blood feeding experiment:**

155 An isolate of *M. ulcerans* obtained from the Mycobacterium Reference Laboratory at the Royal  
156 Brisbane Hospital was used for this experiment. *M. ulcerans* was confirmed via PCR analysis.  
157 Our laboratory was not equipped with facilities to safely conduct transmission experiments, so

158 isolates of *M. ulcerans* were subjected to UV light to kill the pathogen. To confirm the sterility  
159 of the isolates, an aliquot was sub-cultured onto Lowenstein-Jensen (LJ) slants and liquid  
160 Middlebrook 7H9 media supplemented with 10% oleic acid-albumin-dextrose enrichment  
161 (OADC). Inoculated media was kept at 31°C in 25cm<sup>2</sup> tissue culture flasks and observed for 8  
162 weeks for growth. No growth was observed confirming the absence of live bacteria. The killed  
163 isolates were subjected to RT-PCR targeting IS 2404, IS 2606 and KR as described above. RT-  
164 PCR analysis confirmed the presence of *M. ulcerans* DNA.

165 We used an artificial blood feeding method (simple membrane method) described by Finlayson  
166 *et al.* with some modification in this study (Finlayson, Saingamsook, & Somboon, 2015). This  
167 procedure is a simple and affordable alternative for direct host feeding (DHF). The method  
168 involves pouring warmed defibrinated sheep blood (Applied Biological Products Management-  
169 Australia) into the indented base on the underside of a plastic container and then covering it  
170 with a stretched collagen membrane secured by a rubber band. The container is then turned up,  
171 filled with warm water and covered by a lid. The feeder is then placed on the mesh side of the  
172 cage, allowing the mosquitoes to pierce the collagen membrane to access the blood.

173 The experiment was conducted using wild type *Aedes aegypti* hatched and reared in the same  
174 batch, sorted as pupae into four cages containing 30 female mosquitoes in each. One out of  
175 four cages was used as control (Cage-D) where only defibrinated sheep blood was used as feed  
176 and in remaining three cages (Cage-A, B and C) defibrinated sheep blood mixed with killed *M.*  
177 *ulcerans* isolates were used. All four cages were exposed to blood for 2 hours. Fully blood fed  
178 mosquitoes from each cage were aspirated separately and knocked down by freezing. Pool of  
179 mosquitoes from cage A, and B were dissected separating the head, abdomen and legs of each  
180 insects by sterile fine forceps to avoid contamination during dissections. DNA from the head,  
181 abdomen and legs (pooled separately) from the mosquitoes from cage A and B and whole

182 mosquitoes from cage C and D were extracted using FastPrep Instrument (MP Biomedicals,  
183 Solon, OH, USA) as per manufacturer's instruction with FastDNA Kit (MP Biomedicals). All  
184 the extracted DNA were initially screened for IS 2404 and IS 2404-positive samples were re-  
185 analyzed for IS 2606 and KR with RT-PCR assay as described above.

## 186 **Results:**

### 187 **Screening of Mosquitoes:**

188 A total of 16,900 mosquitoes were captured over the course of the study from 30 occasions of  
189 trapping at three different regions of northern Queensland. Total mosquitoes captured from  
190 region-1, region-2 and region-3 were 7880, 5100, and 3920, respectively. The majority of  
191 captured mosquitos belonged to the *Verrallina* genus (specifically *Verrallina lineata*) 82%,  
192 followed by *Coquilletida* (9%) and *Mansonia* (3%). The remaining 6% consisting seven other  
193 genera that were classified as "other" for screening. See figure 3 below.

194

195

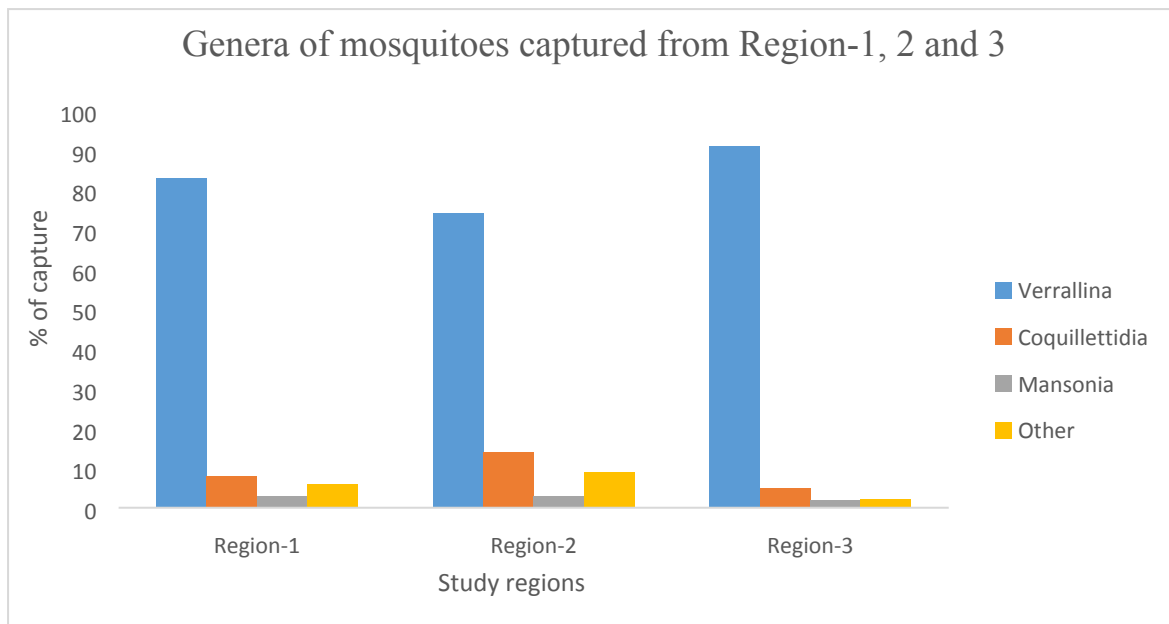

196

197 **Fig. 3. Genera of mosquitoes captured from three different regions: Region-1 comprising**  
198 **83% of *Verrallina sp.*, 8% of *Coquillettidia sp.*, 3% of *Mansonia sp.* and 6% of**  
199 **others; Region-2 comprising 74% of *Verrallina sp.*, 14% of *Coquillettidia sp.*, 3%**  
200 **of *Mansonia sp.* and 9% of others and Region-3 comprising 91% of *Verrallina***  
201 ***sp.*, 5% of *Coquillettidia sp.*, 2% of *Mansonia sp.* and 2% of others of total catches.**

202 Of total 16,900 mosquitoes screened (845 pools), seven pools were positive for IS 2404. Three  
203 of those seven pools were *Verrallina sp.* from region-1, two pools were *Coquillettidia sp.* one  
204 each from capture region-1 and 3 and the remaining two pools were *Mansonia sp.* from region-  
205 1. Of the seven pools positive for IS 2404, one pool was positive for *M. ulcerans* using the  
206 confirmatory PCR assays. This single positive pool of mosquitoes was comprised of genus  
207 *Verrallina sp.* and linked to region-1. Thirty pools of mosquitoes which were negative for IS  
208 2404 were tested for IS 2606 and KR. None of them were positive for these probes signifying  
209 the dependent nature of existence of IS 2606 and KR with IS 2404. Similar findings were  
210 reported during the Victorian outbreak (5).

211 **Screening of March flies:**

212 DNA extracts of 296 March flies were screened for IS 2404. None of the samples were positive  
213 for this probe. Twenty-four randomly selected IS 2404 negative samples were tested for IS  
214 2606 and KR and none were positive.

215 **Mosquito artificial blood feeding experiment:**

216 There were a total of seven samples: 2 pools of heads, 2 pools of abdomens, 2 pools of legs  
217 (from cage A and B) and 1 pool of whole mosquitoes (Cage C). DNA extracted from pools of  
218 heads and abdomens of mosquitoes from cage A and B and the pool of whole mosquitoes from  
219 Cage C were positive for IS-2404. Confirmatory assays targeting IS 2606 and KR revealed that  
220 three samples: DNA extract from the heads of mosquitoes from cage A and B and the pool of  
221 mosquitoes from cage C were positive for *M. ulcerans* DNA. Controls (a pool of mosquitoes  
222 from cage D) were negative for all three targets: IS 2404, IS 2606 and KR.

223 **Discussion:**

224 Mosquitos serve as important biological vectors for a variety of pathogens. The movement of  
225 pathogens from the gastro-intestinal tract after ingestion to the salivary glands for subsequent  
226 transmission is well documented for many diseases. However, this phenomenon has not been  
227 demonstrated for *M. ulcerans*. A study conducted by Wallace and colleagues (2010) provided  
228 evidence on the maintenance of *M. ulcerans* throughout larval development without further  
229 passage of the organisms into pupa or adult mosquitoes (19). They concluded that mosquitoes  
230 were an unlikely biological vector of *M. ulcerans*. Wallace *et al* (2017) subsequently provided  
231 evidence of mechanical transmission of *M. ulcerans* via anthropogenic skin puncture or  
232 mosquito bites (7). Detection of *M. ulcerans* from pools of head of mosquitoes in our mosquito  
233 artificial blood feeding experiments indicate a potential for mosquitoes act as an agent for

234 mechanical transmission of *M. ulcerans*. However, our mosquito artificial blood feeding  
235 experiment had some limitations. We were not able to conduct experiments to verify whether  
236 *M. ulcerans* positive mosquitoes transmit pathogen to healthy animal or not. Only proboscises  
237 of mosquitoes were in direct contact with blood containing *M. ulcerans* DNA. *M. ulcerans*  
238 was only detected from the abdomen of mosquitoes using the IS2404 target. This might have  
239 been due to insufficient amount of DNA to identify IS 2606 and KR.

240 For mechanical transmission, insect vectors such as mosquitoes must acquire the pathogen  
241 either from the environment or an infected host. For this to occur efficiently, the organism must  
242 be abundantly present in the environment. A survey in Victoria, Australia has confirmed a  
243 strong correlation between mosquitoes found to test positive for carrying *M. ulcerans* and the  
244 number of human cases of BU occurring (5). The group found a significantly higher number  
245 of mosquitoes screened positive for *M. ulcerans* during an intense outbreak of BU in endemic  
246 areas, in comparison to areas with a lower incidence of human cases.

247 The number of human cases of BU has decreased in Northern Queensland, Australia since the  
248 largest recorded outbreak in 2011 (> 60 cases). The majority of the cases during the 2011  
249 outbreak were from Wonga and the Wonga beach area, referred as region-1 in the study by  
250 Steffen and Freeborn (2018) (20). Out of 394 pools collected, only one from region-1 was  
251 positive for *M. ulcerans* in this study. Interestingly, mosquitoes of this positive pool were  
252 trapped in the backyard of a property in Wonga Beach area (region-1) where two human cases  
253 of BU were confirmed in 2017. All other pools of mosquitoes and march flies collected from  
254 that properties negative for *M. ulcerans*.

255 In a separate study conducted in Northern Queensland, Australia, one pool of mosquitoes was  
256 found positive for *M. ulcerans* out of two pools collected in total (14). However, it must be

257 noted that this study was conducted soon after 2011 which raises the possibility that sampling  
258 should occur as close as possible in time to when transmission is thought to be occurring.

259 *M. ulcerans* is an environmental pathogen and detection of *M. ulcerans* positive mosquitoes  
260 may only be an indicator for the presence of the organism in the environment. A significant  
261 decrease in human cases of BU in Northern Queensland in recent years could be due to a lower  
262 load of bacteria in the environment. This may explain the low detection of *M. ulcerans* positive  
263 mosquitoes and March fly populations in the study sites. However, the detection of *M. ulcerans*  
264 even in a single pool of mosquitoes from the endemic areas of Northern Queensland is  
265 significant, as it corroborates findings in Victoria where five different species of mosquitoes  
266 captured from BU-endemic regions during human outbreaks were positive for *M. ulcerans*.

267 Our detection of *M. ulcerans* in mosquitoes in Northern Queensland does support the earlier  
268 report from Victoria in Australia (5). The Victorian study provides evidence for high detection  
269 rates of *M. ulcerans* positive mosquitoes if captured during peak times of outbreaks. Our study  
270 found that it is less likely to find *M. ulcerans* positive mosquitoes if they are trapped from areas  
271 where human incidence of BU is currently low. We hypothesize that mosquitoes and perhaps  
272 other biting insects, such as March flies may have a significant role in the ecology and  
273 transmission of *M. ulcerans* in endemic areas during outbreaks and that the level of detection  
274 of *M. ulcerans* positive mosquitoes in the environment could be an indicator for disease  
275 outbreaks.

## 276 **Acknowledgements:**

277 We thank laboratory staff of Mosquito Research Facility, AITHM for their technical advice  
278 trapping of mosquitoes and designing blood feeding experiments and Janet Fyfe from  
279 Mycobacterium Reference Laboratory at VIDRL for her technical advice in analyzing samples.

280 We are grateful to Wonga Beach State School for their assistance in collection of March flies.

281 We thank Hendrik Weimar and local community for their continuous support and assistance in

282 arranging access to the sites for setting traps.

283

## 284 **References:**

285 1. George KM, Chatterjee D, Gunawardana G, Welty D, Hayman J, Lee R, et al.  
286 Mycolactone: a polyketide toxin from *Mycobacterium ulcerans* required for virulence. *Science*.  
287 1999;283(5403):854-7.

288 2. Williamson HR, Benbow ME, Nguyen KD, Beachboard DC, Kimbirauskas RK,  
289 McIntosh MD, et al. Distribution of *Mycobacterium ulcerans* in buruli ulcer endemic and non-  
290 endemic aquatic sites in Ghana. *PLoS Negl Trop Dis*. 2008;2(3):e205.

291 3. Fyfe JA, Lavender CJ, Handasyde KA, Legione AR, O'Brien CR, Stinear TP, et al. A  
292 major role for mammals in the ecology of *Mycobacterium ulcerans*. *PLoS neglected tropical*  
293 *diseases*. 2010;4(8):e791.

294 4. Vandellannoote K, Durnez L, Amissah D, Gryseels S, Doodoo A, Yeboah S, et al.  
295 Application of real-time PCR in Ghana, a Buruli ulcer-endemic country, confirms the presence  
296 of *Mycobacterium ulcerans* in the environment. *FEMS microbiology letters*. 2010;304(2):191-  
297 4.

298 5. Johnson PD, Azuolas J, Lavender CJ, Wishart E, Stinear TP, Hayman JA, et al.  
299 *Mycobacterium ulcerans* in mosquitoes captured during outbreak of Buruli ulcer, southeastern  
300 Australia. *Emerging infectious diseases*. 2007;13(11):1653-60.

301 6. Marsollier L, Robert R, Aubry J, Saint Andre JP, Kouakou H, Legras P, et al. Aquatic  
302 insects as a vector for *Mycobacterium ulcerans*. *Applied and environmental microbiology*.  
303 2002;68(9):4623-8.

304 7. Wallace JR, Mangas KM, Porter JL, Marcsisin R, Pidot SJ, Howden B, et al.  
305 *Mycobacterium ulcerans* low infectious dose and mechanical transmission support insect bites  
306 and puncturing injuries in the spread of Buruli ulcer. *PLoS Negl Trop Dis*.  
307 2017;11(4):e0005553.

308 8. Marston BJ, Diallo MO, Horsburgh CR, Jr., Diomande I, Saki MZ, Kanga JM, et al.  
309 Emergence of Buruli ulcer disease in the Daloa region of Cote d'Ivoire. *The American journal*  
310 *of tropical medicine and hygiene*. 1995;52(3):219-24.

311 9. Aiga H, Amano T, Cairncross S, Adomako J, Nanas OK, Coleman S. Assessing water-  
312 related risk factors for Buruli ulcer: a case-control study in Ghana. *The American journal of*  
313 *tropical medicine and hygiene*. 2004;71(4):387-92.

314 10. Francis G, Whitby M, Woods M. *Mycobacterium ulcerans* infection: a rediscovered  
315 focus in the Capricorn Coast region of central Queensland. *The Medical journal of Australia*.  
316 2006;185(3):179-80.

317 11. Steffen CM, Smith M, McBride WJ. *Mycobacterium ulcerans* infection in North  
318 Queensland: the 'Daintree ulcer'. *ANZ journal of surgery*. 2010;80(10):732-6.

319 12. Radford AJ. *Mycobacterium ulcerans* in Australia. *Australian and New Zealand journal*  
320 *of medicine*. 1975;5(2):162-9.



- 321 13. Quek TY, Athan E, Henry MJ, Pasco JA, Redden-Hoare J, Hughes A, et al. Risk factors  
322 for *Mycobacterium ulcerans* infection, southeastern Australia. *Emerging infectious diseases*.  
323 2007;13(11):1661-6.
- 324 14. Roltgen K, Pluschke G, Johnson PDR, Fyfe J. *Mycobacterium ulcerans* DNA in  
325 Bandicoot Excreta in Buruli Ulcer-Endemic Area, Northern Queensland, Australia. *Emerging*  
326 *infectious diseases*. 2017;23(12):2042-5.
- 327 15. Steffen CM, Freeborn H. *Mycobacterium ulcerans* in the Daintree 2009–2015 and the  
328 mini-epidemic of 2011. *ANZ J Surg*. 2018;88(4):E289-E93.
- 329 16. Sriwichai P, Karl S, Samung Y, Sumruayphol S, Kiattibutr K, Payakkapol A, et al.  
330 Evaluation of CDC light traps for mosquito surveillance in a malaria endemic area on the Thai-  
331 Myanmar border. *Parasites & vectors*. 2015;8:636.
- 332 17. Fyfe JA, Lavender CJ, Johnson PD, Globan M, Sievers A, Azuolas J, et al.  
333 Development and application of two multiplex real-time PCR assays for the detection of  
334 *Mycobacterium ulcerans* in clinical and environmental samples. *Applied and environmental*  
335 *microbiology*. 2007;73(15):4733-40.
- 336 18. Maman I, Tchacondo T, Kere AB, Beissner M, Badziklou K, Tedihou E, et al.  
337 Molecular detection of *Mycobacterium ulcerans* in the environment and its relationship with  
338 Buruli ulcer occurrence in Zio and Yoto districts of maritime region in Togo. *PLoS Negl Trop*  
339 *Dis*. 2018;12(5):e0006455.
- 340 19. Wallace JR, Gordon MC, Hartsell L, Mosi L, Benbow ME, Merritt RW, et al.  
341 Interaction of *Mycobacterium ulcerans* with mosquito species: implications for transmission  
342 and trophic relationships. *Appl Environ Microbiol*. 2010;76(18):6215-22.
- 343 20. Steffen CM, Freeborn H. *Mycobacterium ulcerans* in the Daintree 2009–2015 and the  
344 mini-epidemic of 2011. *ANZ journal of surgery*. 2018;88(4):E289-E93.

345

### Region-3

Upper Daintree

Daintree

Stewart Creek Valley

### Region-2

Forest Creek

Kimberley

Lower Daintree

Daintree River

### Region-1

Wonga

Bambo

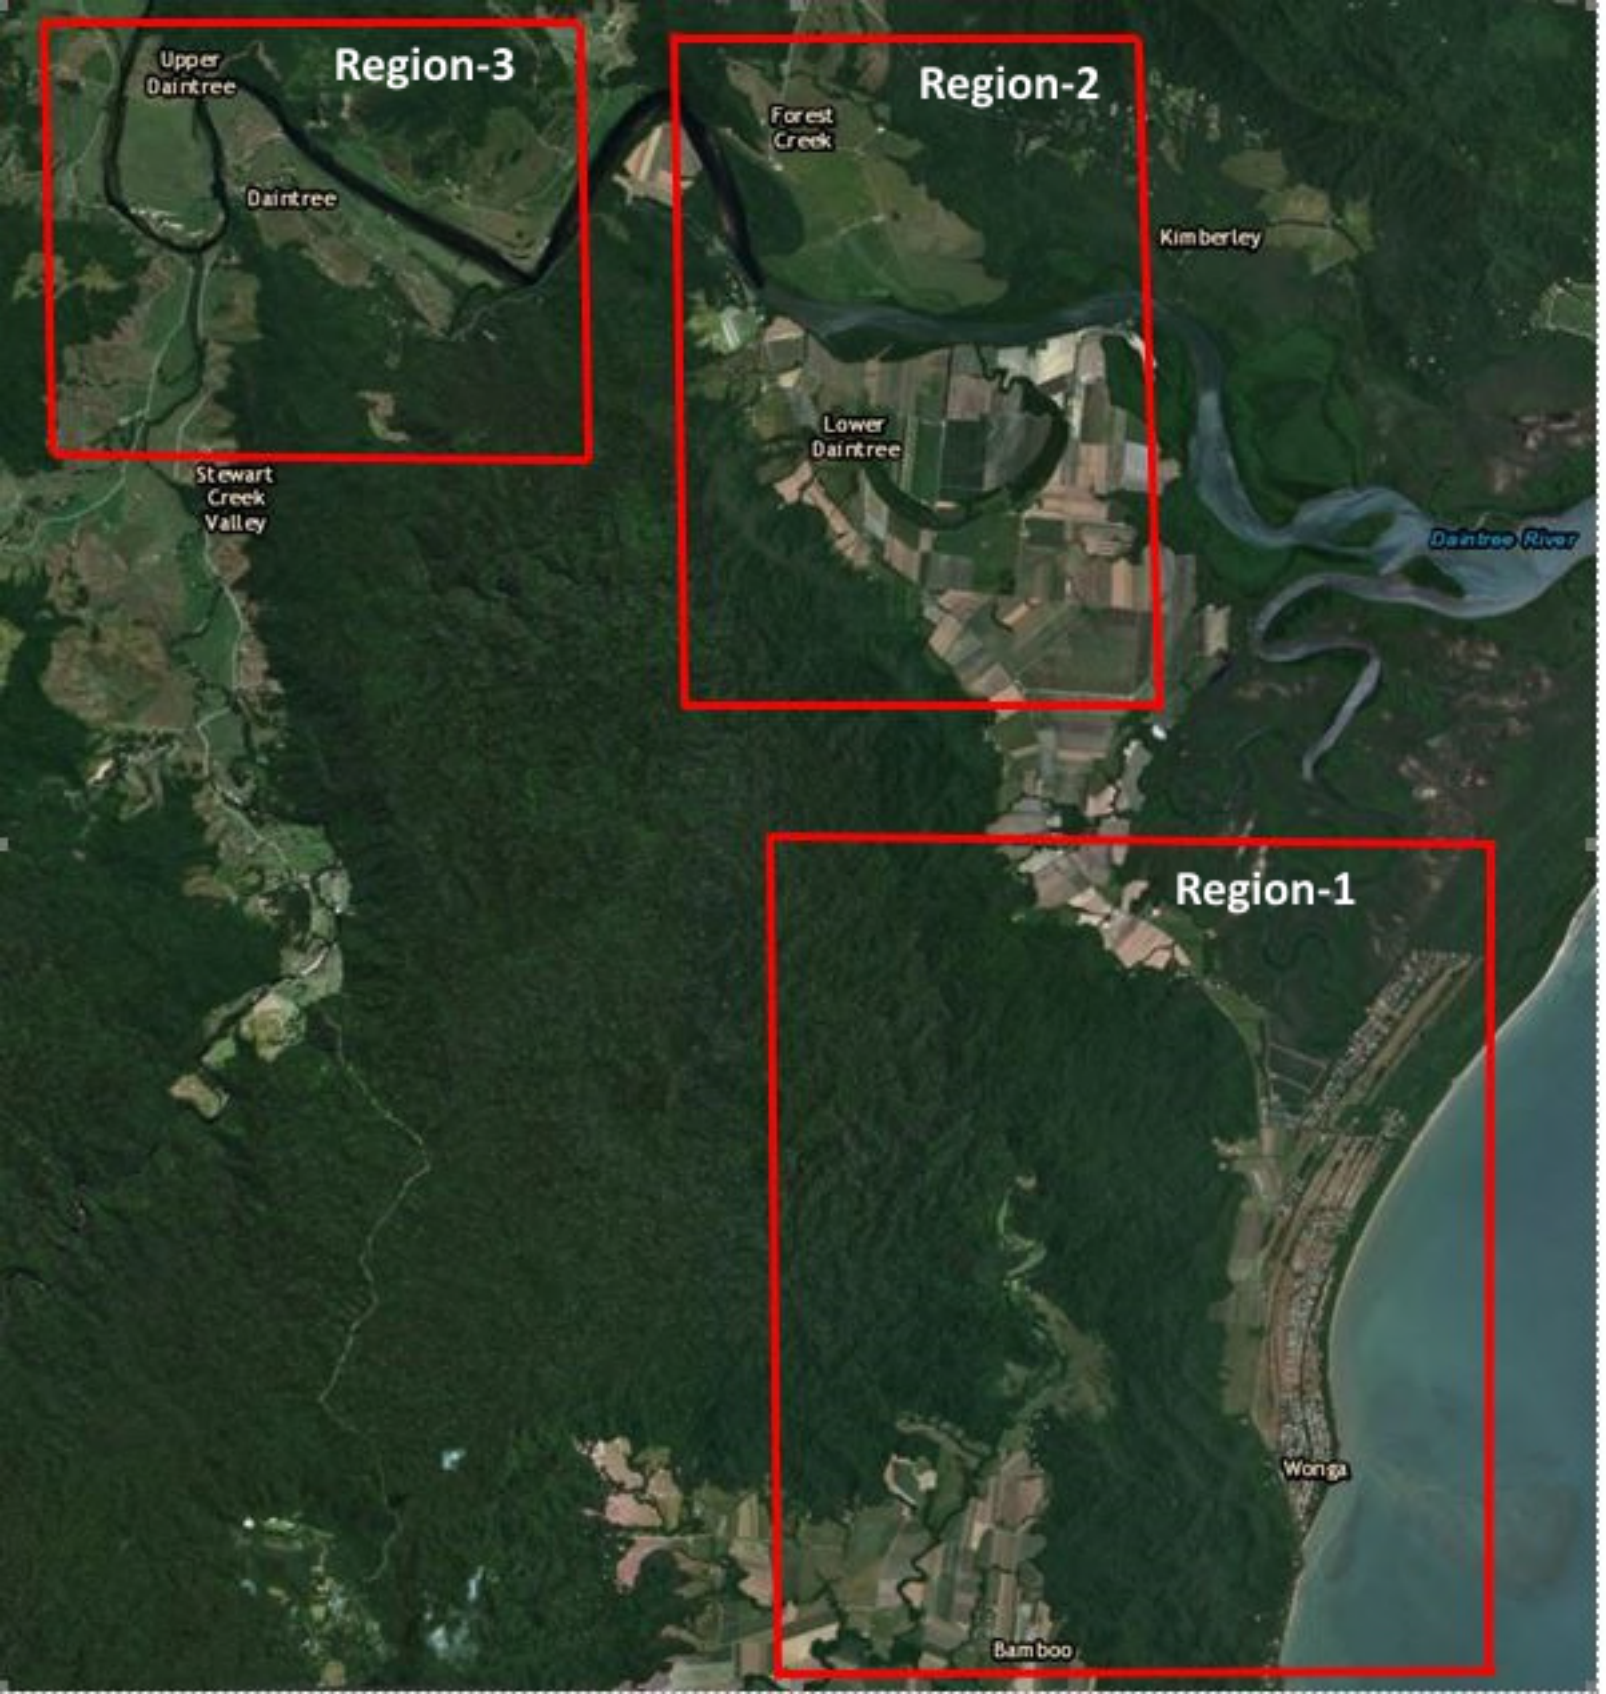

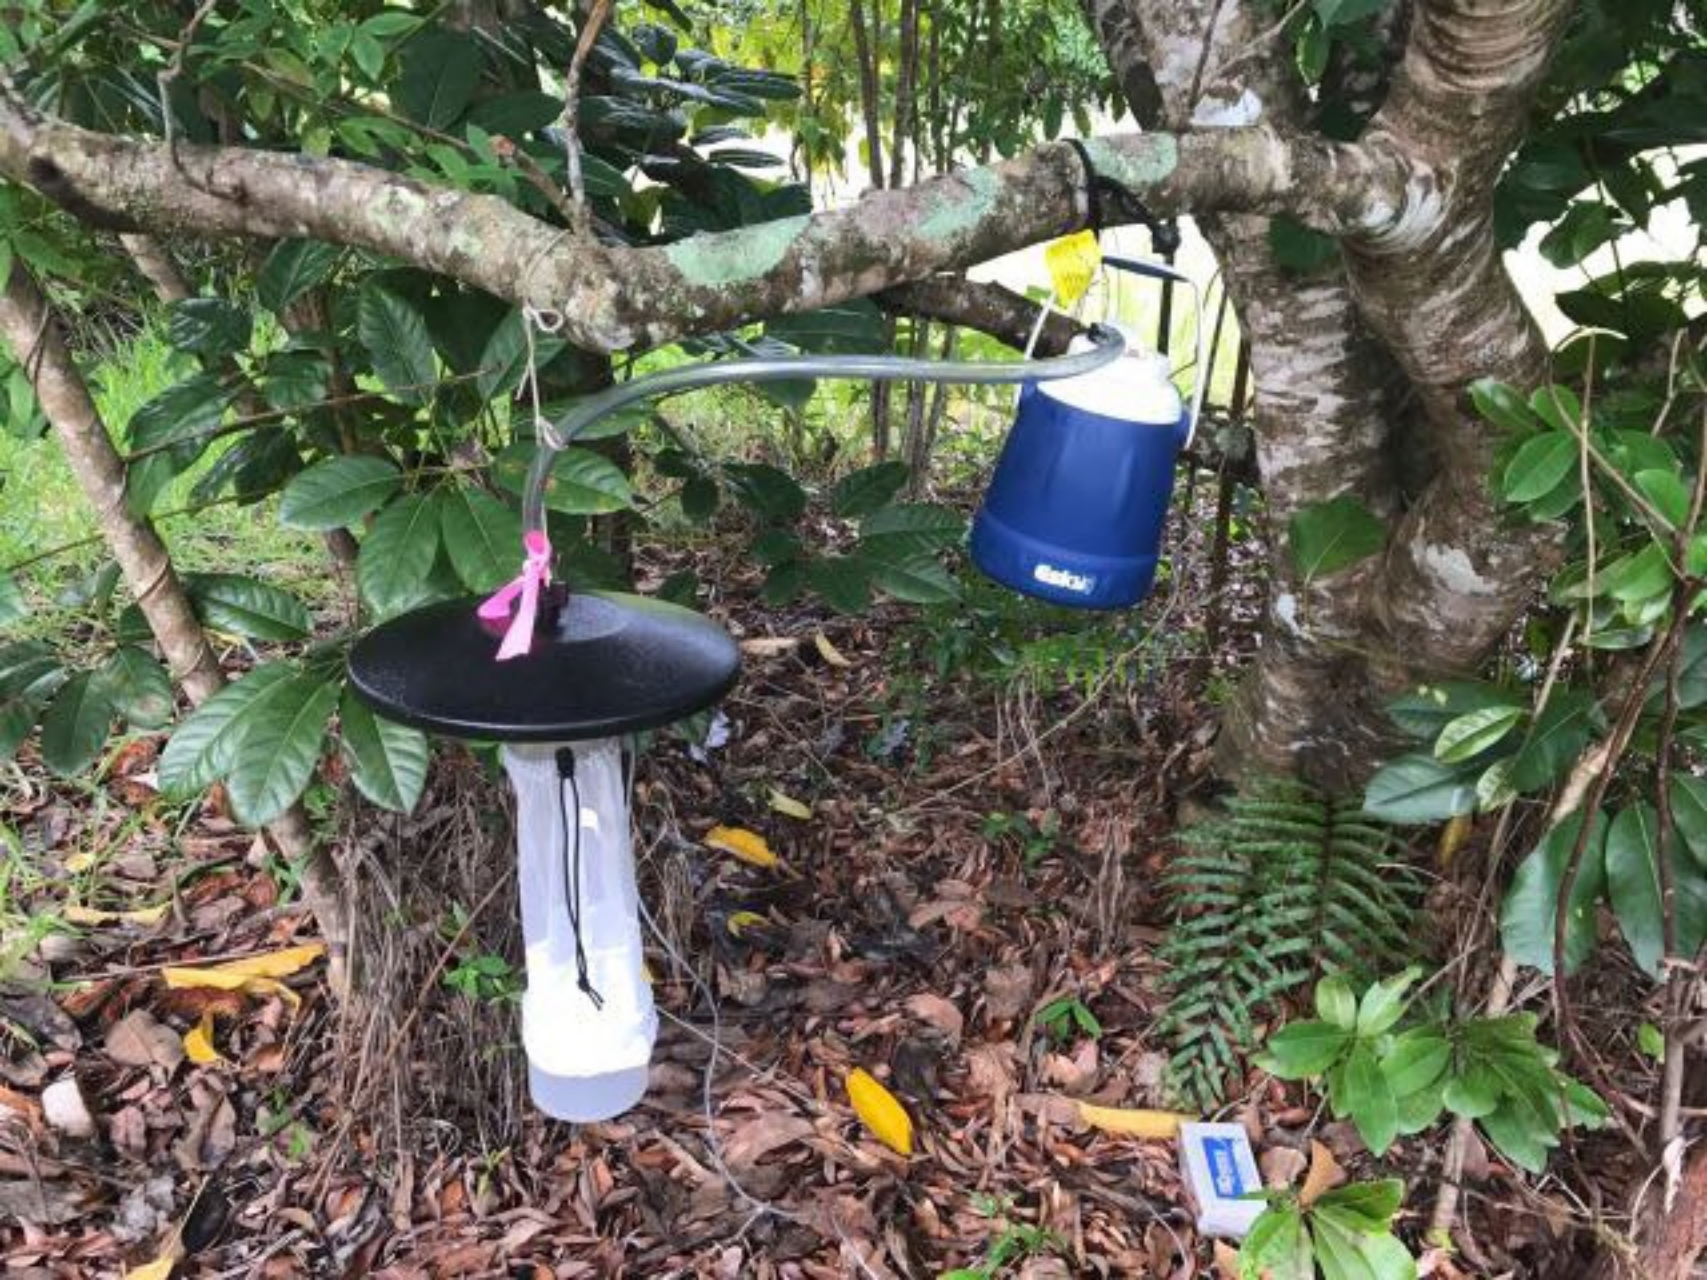

Source: https://www.biorxiv.org/content/10.1101/390997v1.full.pdf
